# Supplementary material
Source: PubMed Central journal article supplement (PMC3725824)
Supplement: NIHMS285017-supplement-01.pdf [file NIHMS285017-supplement-01.pdf]

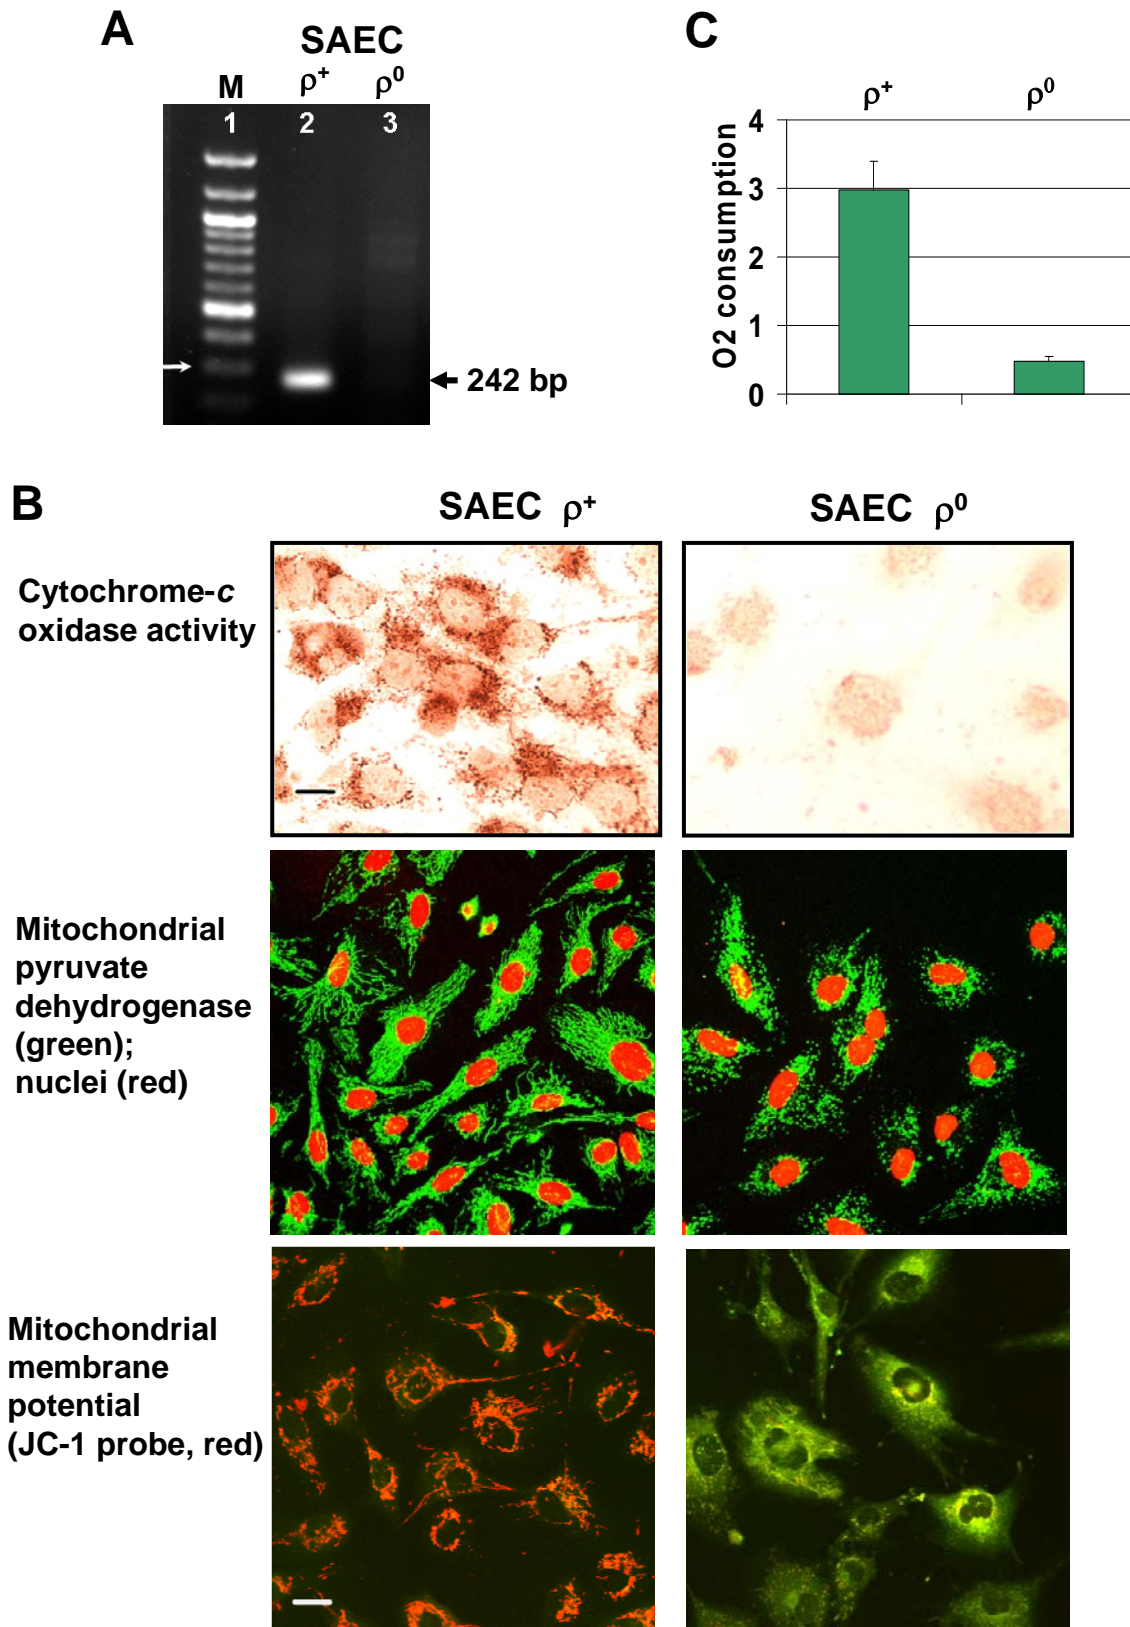

**Suppl. Fig. 1. Mitochondrial (mt) DNA-depleted small airway epithelial cells (SAEC  $\rho^0$ ) and their parental cells (SAEC  $\rho^+$ ).** **A.** PCR amplification of the mtDNA fragment (242 bp) from SAEC  $\rho^+$  using mtDNA primer set. **B.** Cytochrome-c oxidase activity (the upper panel), pyruvate dehydrogenase immunostaining and mitochondrial membrane potential (JC-1 probe, red fluorescence) in  $\rho^+$  and  $\rho^0$  cells. **C.** Rates of oxygen consumption (Femtomole/cell/min) for  $\rho^+$  and  $\rho^0$  cells were determined using an oxygen electrode unit.
