# Supplementary material
Source: PubMed Central journal article supplement (PMC3725824)
Supplement: NIHMS285017-supplement-02.pdf [file NIHMS285017-supplement-02.pdf]

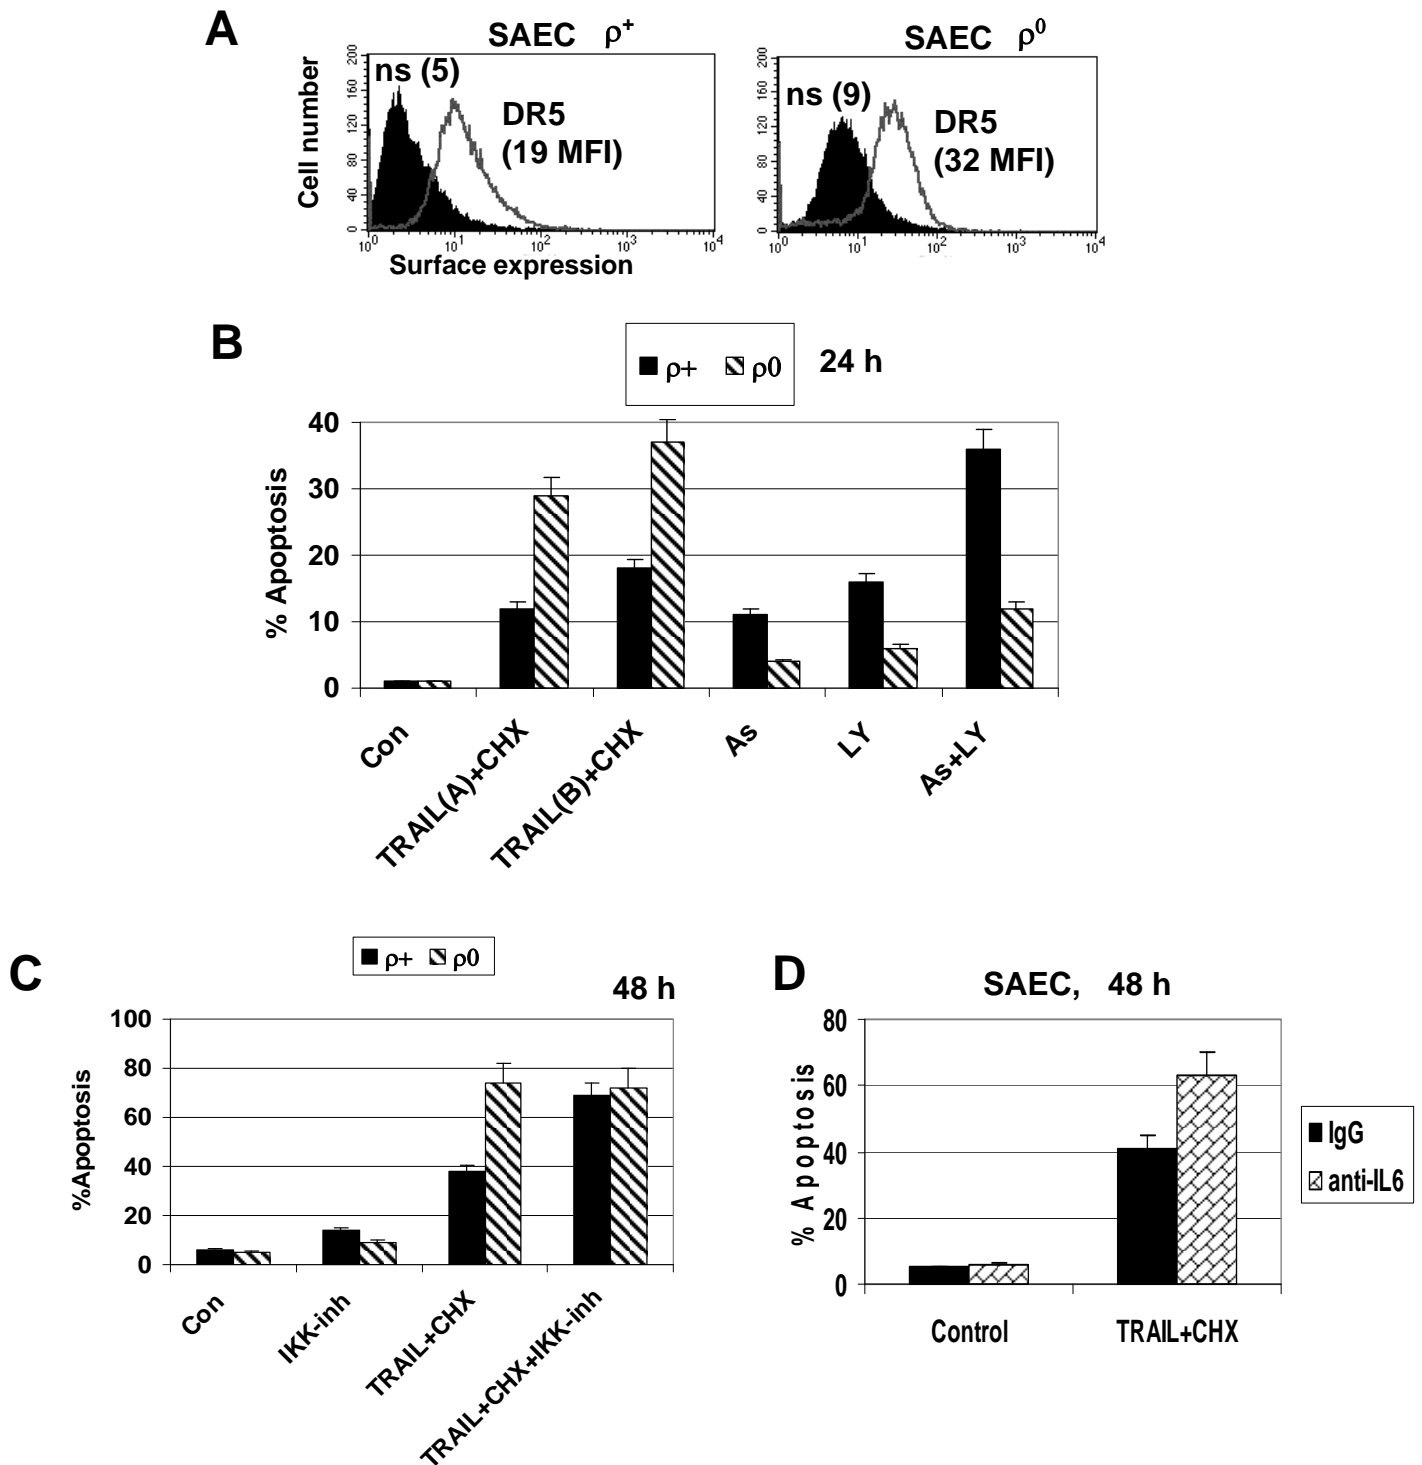

**Suppl. Fig. 2A. Apoptotic analysis of mtDNA-depleted small airway epithelial cells (SAEC  $\rho^0$ ) and their parental cells (SAEC  $\rho^+$ ).** Surface expression of DR5 was determined with immunostaining using the corresponding PE-labeled mAb followed by FACS analysis. **B.** Apoptosis was induced using TRAIL(A) (50 ng/ml), TRAIL(B) (100 ng/ml) and CHX (1  $\mu$ g/ml); sodium arsenite (As, 4  $\mu$ M), LY294002 (LY, 50  $\mu$ M) or their combination. **C.** Effects of suppression IKK $\beta$ -NF- $\kappa$ B by BMS-345541 (10  $\mu$ M) on TRAIL+CHX induced apoptosis. **D.** Effects of IL6 suppression by anti-IL6 inhibitory mAb (5  $\mu$ g/ml) in the cell media on TRAIL+CHX induced apoptosis of SAEC. Apoptosis levels (% cells in pre-G1/G0) were determined 24-48 h after treatment using PI staining and FACS analysis. *Error bars represent mean  $\pm$  S.D. (Student's *t* test,  $p < 0.05$ ).*
